# Supplementary material for: Enhanced Expression of p53 and Suppression of PI3K/Akt/mTOR by Three Red Sea Algal Extracts: Insights on Their Composition by LC-MS-Based Metabolic Profiling and Molecular Networking
Source: MDPI journal article supplement (doi:10.3390/md21070404), 2023-07-17
Supplement: s1 [file s1]

## Supplementary file

### Enhanced Expression of p53 and Suppression of PI3K/Akt/mTOR by Three Red Sea Algal Extracts: Insights on their Composition by LC-MS-based Metabolic Profiling and Molecular Networking

Nouran M Fahmy <sup>1#</sup>, Mariam I Gamal El-Din <sup>1#</sup>, Maha M Salem <sup>2</sup>, Sarah H Rashedy <sup>3</sup>, Gyu Sung Lee <sup>4</sup>, Yoon Seo Jang <sup>5</sup>, Ki Hyun Kim <sup>5</sup>, Chung Sub Kim <sup>4,5,\*</sup>, Mohamed El-Shazly <sup>1\*</sup>, Shaimaa Fayed <sup>1</sup>

<sup>1</sup>Department of Pharmacognosy, Faculty of Pharmacy, Ain-Shams University, Cairo 11566, Egypt; [nouran\\_fahmy@pharma.asu.edu.eg](mailto:nouran_fahmy@pharma.asu.edu.eg), [mariam\\_gamal@pharma.asu.edu.eg](mailto:mariam_gamal@pharma.asu.edu.eg), [mohamed.elshazly@pharma.asu.edu.eg](mailto:mohamed.elshazly@pharma.asu.edu.eg), [shaimaa\\_fayed@pharma.asu.edu.eg](mailto:shaimaa_fayed@pharma.asu.edu.eg).

<sup>2</sup>Biochemistry Division, Chemistry Department, Faculty of Science, Tanta University, Tanta 31527, Egypt; [maha\\_salem@science.tanta.edu.eg](mailto:maha_salem@science.tanta.edu.eg).

<sup>3</sup>National Institute of Oceanography and Fisheries (NIOF), Cairo 11516, Egypt; [sarahamdy.niof@gmail.com](mailto:sarahamdy.niof@gmail.com)

<sup>4</sup>Department of Biopharmaceutical Convergence, Sungkyunkwan University, Suwon, 16419, Republic of Korea; [dlrbtjd36@skku.edu](mailto:dlrbtjd36@skku.edu), [chungsub.kim@skku.edu](mailto:chungsub.kim@skku.edu)

<sup>5</sup>School of Pharmacy, Sungkyunkwan University, Suwon 16419, Republic of Korea; [bbj0423@g.skku.edu](mailto:bbj0423@g.skku.edu), [khkim83@skku.edu](mailto:khkim83@skku.edu), [chungsub.kim@skku.edu](mailto:chungsub.kim@skku.edu)

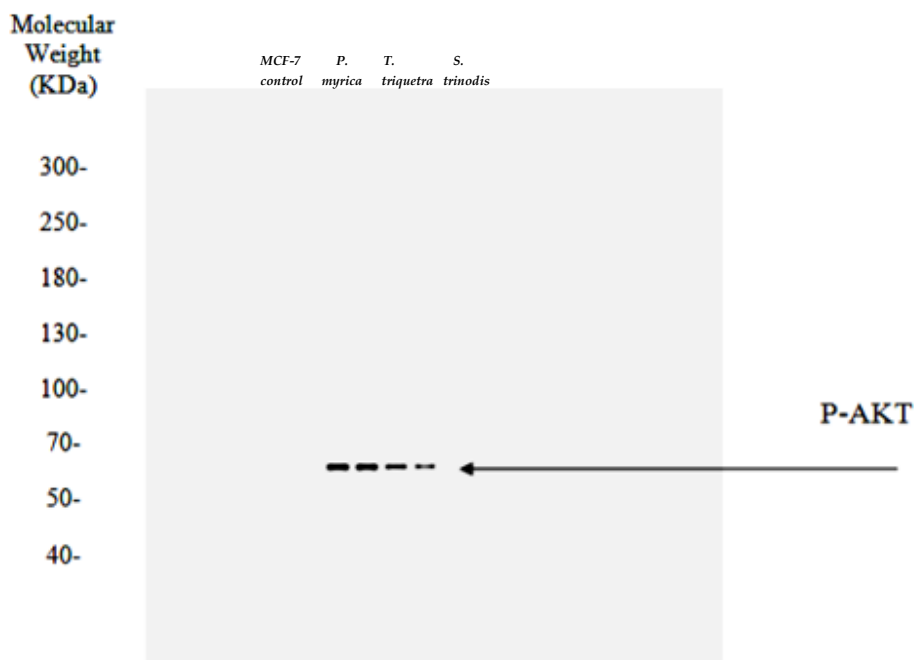

**Figure S1.** Ant-p-Akt antibody protein expression level for algae extracts. The whole raw data immunoblotting gel before cropping

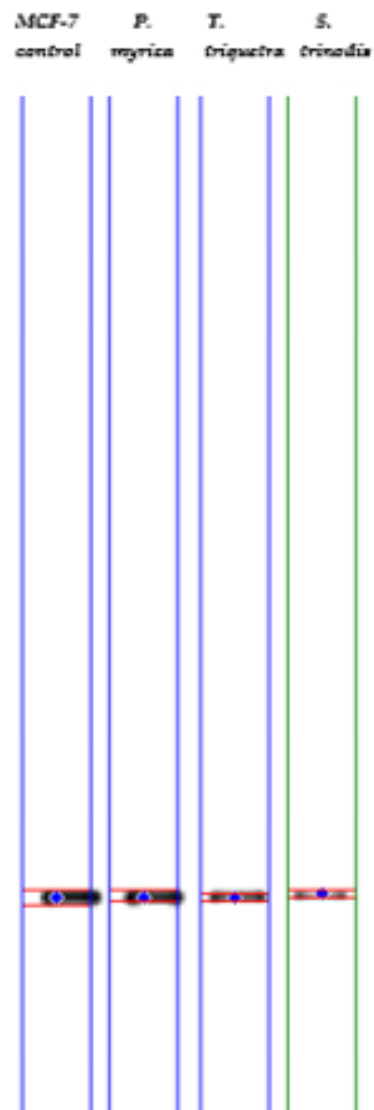

**Figure S2.** Computerized bands analysis of anti-p-Akt antibody protein expression level for algae extracts.

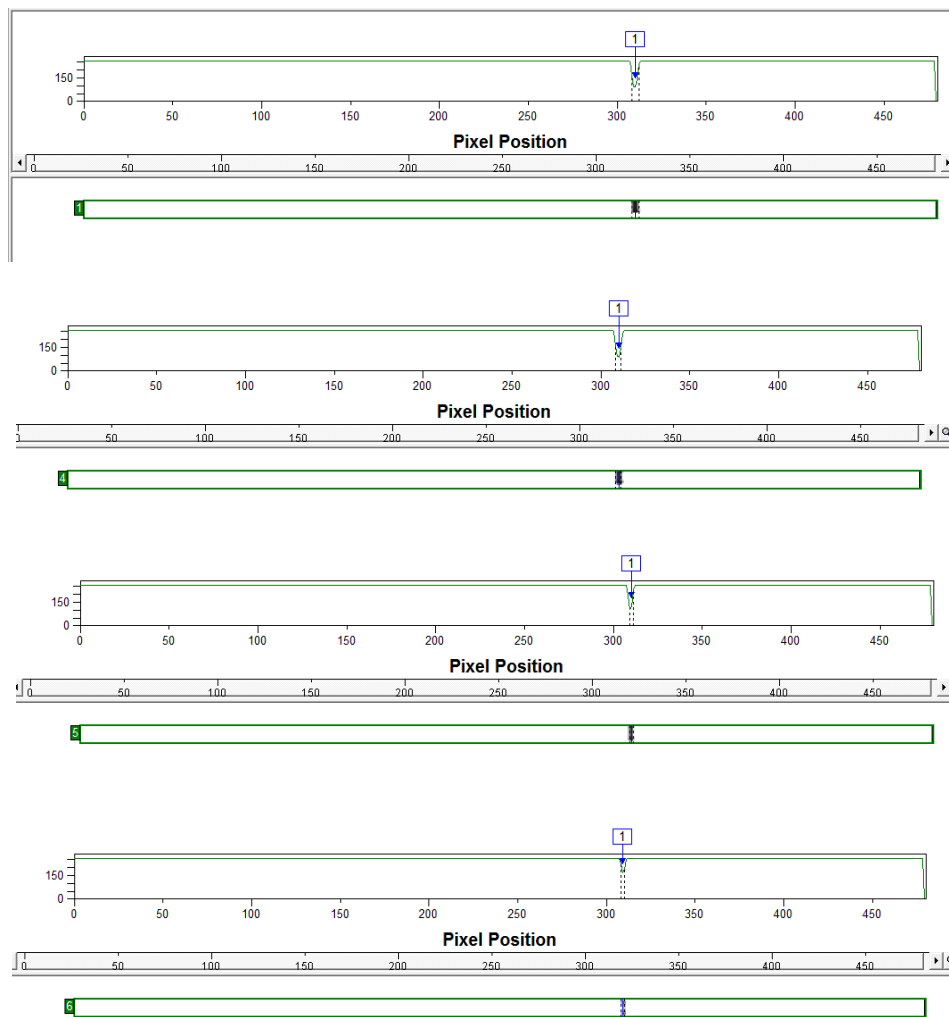

**Figure S3.** Dendrograms of anti-p-Akt antibody protein expression level bands analysis for all algae extracts.

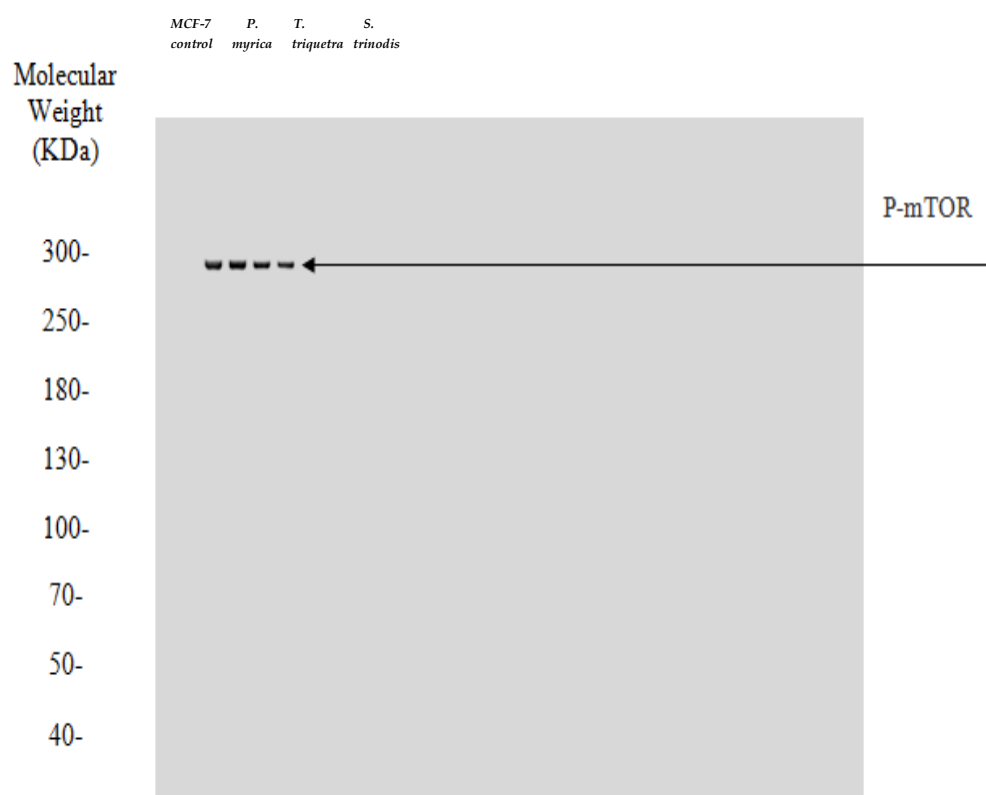

**Figure S4.** Anti-p-mTOR antibody protein expression level for algae extracts. The whole raw data immunoblotting gel before cropping

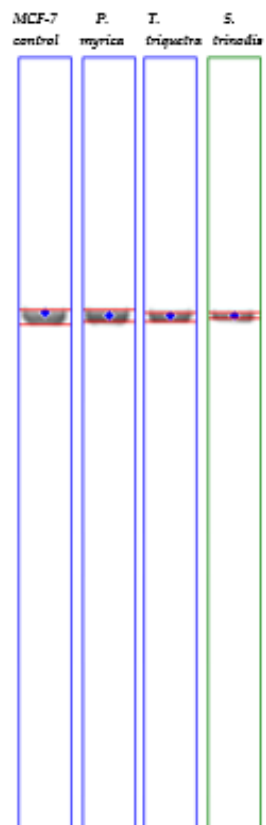

**Figure S5.** Computerized bands analysis of anti-p-mTOR antibody protein expression level for algae extracts.

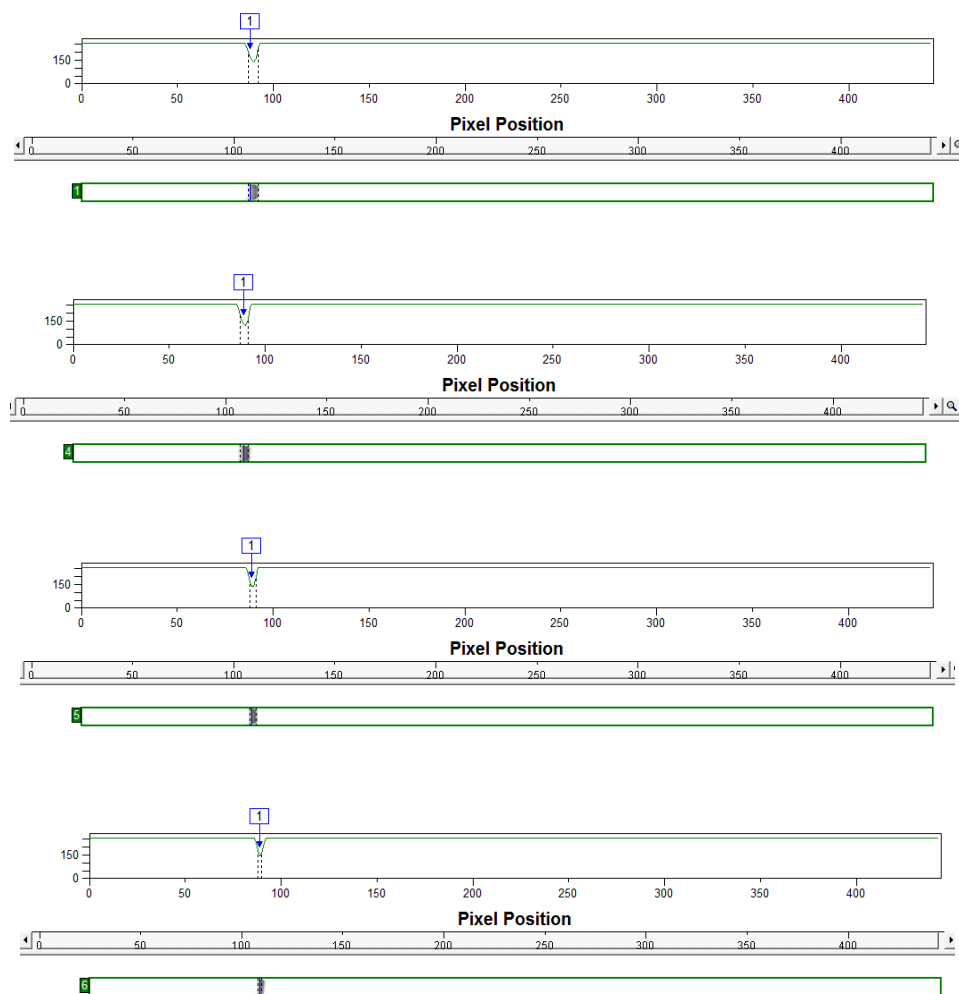

**Figure S6.** Dendrograms of anti-p-mTOR antibody protein expression level band analysis for algae extracts.

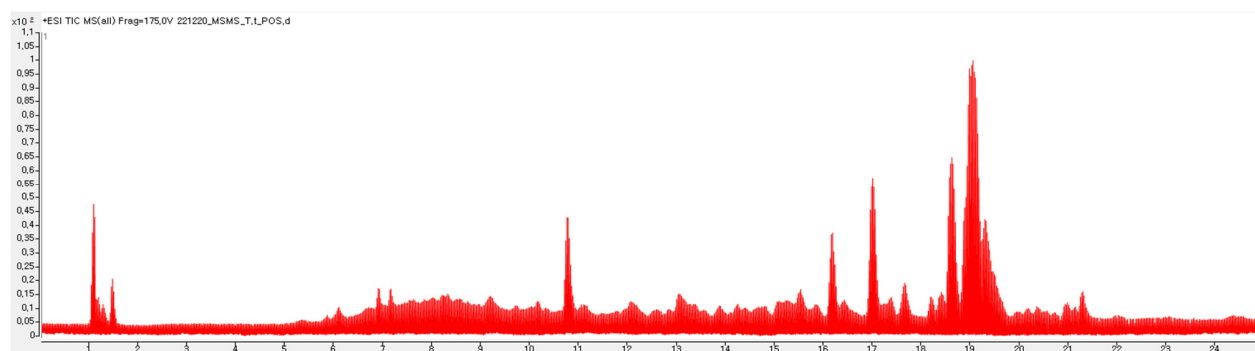

**Figure S7.** Total ion chromatogram of the extract of the Red Sea algae *T. triquetra* in positive modes.

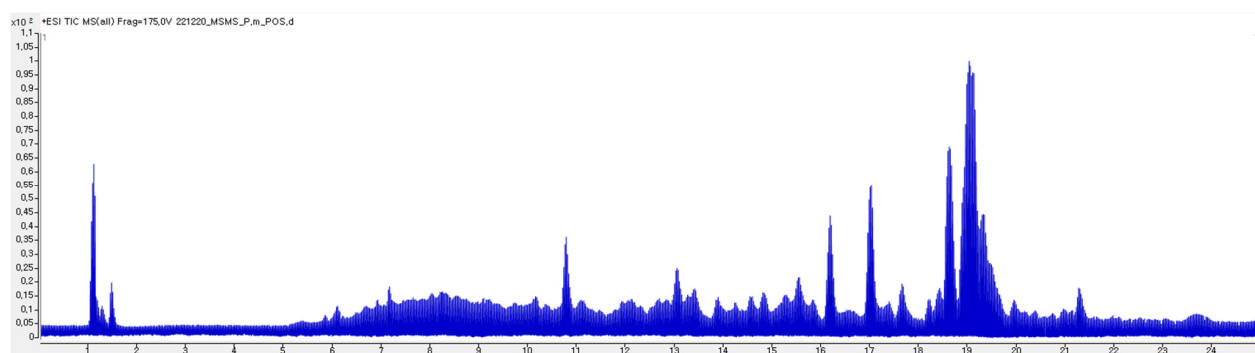

**Figure S8.** Total ion chromatogram of the extract of the Red Sea algae *P. myrica* in positive mode.

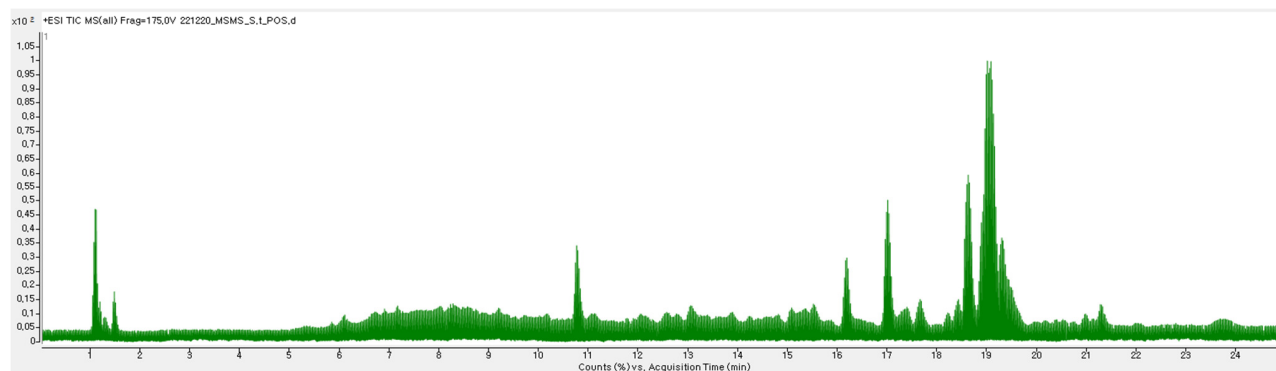

**Figure S9.** Total ion chromatogram of the extract of the Red Sea algae *S. trinodis* in positive mode.

**Table S1.** The expression level of anti-p-Akt protein bands after normalized with  $\beta$ -actin for algae extracts.

| MCF-7 control | <i>P. myrica</i> | <i>T. triquetra</i> | <i>S. trinodis</i> |
|---------------|------------------|---------------------|--------------------|
| Lane %        | Lane %           | Lane %              | Lane %             |
| 0.80          | 0.48             | 0.35                | 0.29               |

**Table S2.** The expression level of anti-p-mTOR protein bands after normalized with  $\beta$ -actin for algae extracts.

| MCF-7 control | <i>P. myrica</i> | <i>T. triquetra</i> | <i>S. trinodis</i> |
|---------------|------------------|---------------------|--------------------|
| Lane %        | Lane %           | Lane %              | Lane %             |
| 0.72          | 0.53             | 0.39                | 0.28               |
